# Supplementary material for: Comparative interactomics analysis of different ALS-associated proteins identifies converging molecular pathways
Source: PubMed Central journal article supplement (PMC4947123; doi:10.1007/s00401-016-1575-8), 2016-05-10
Supplement: 401_2016_1575_MOESM2_ESM.pdf [file 401_2016_1575_MOESM2_ESM.pdf]

## **Supplementary Tables**

### **Comparative interactomics analysis of different ALS-associated proteins identifies converging molecular pathways**

Anna M. Blokhuis, Max Koppers, Ewout J.N. Groen, Dianne M.A. van den Heuvel, Stefano Dini Modigliani, Jasper J. Anink, Katsumi Fumoto, Femke van Diggelen, Anne Snelting, Peter Soodaar, Bert M. Verheijen, Jeroen A.A. Demmers, Jan H. Veldink, Eleonora Aronica, Irene Bozzoni, Jeroen den Hertog, Leonard H. van den Berg and R. Jeroen Pasterkamp

Corresponding author:

R. J. Pasterkamp

Department of Translational Neuroscience, Brain Center Rudolf Magnus, University Medical Center Utrecht, Utrecht, The Netherlands

r.j.pasterkamp@umcutrecht.nl

#### **Includes:**

Supplementary Table S1a-f

Supplementary Table S2

**Supplementary Table S1a: ATXN2 interactors and GO analysis**

| DNA/RNA helicases | Elavl proteins | EIFs   | FXR proteins | hnRNPs    | Other RNA/DNA binding proteins |         | Ribosomal proteins | snRNPs | Others        | Splicing factors |
|-------------------|----------------|--------|--------------|-----------|--------------------------------|---------|--------------------|--------|---------------|------------------|
| Ddx1              | Elavl1         | Eif2c2 | Fmr1         | Hnrnpa0   | Alyref                         | Msi1    | Rpl11              | Snrpa  | 4930550L24Rik | Sf3b2            |
| Ddx21             | Elavl2         | Eif2s1 | Fxr1         | Hnrnpa1   | Atxn2l                         | Msi2    | Rplp0              | Snrpa1 | Ahnak         | Sf3b3            |
| Ddx3x             | Elavl3         | Eif3a  | Fxr2         | Hnrnpa2b1 | C1qbp                          | Myef2   | Rps10              |        | Alg13         | Sfpq             |
| Ddx5              | Elavl4         | Eif3b  |              | Hnrnpa3   | Caprin1                        | Ncbp1   | Rps12              |        | Cad           | Srsf10           |
| Ddx6              |                | Eif3c  |              | Hnrnpab   | Carm1                          | Ncl     | Rps13              |        | Cct5          | Srsf3            |
| Dhx15             |                | Eif3d  |              | Hnrnpc    | Casc3                          | Nufip2  | Rps14              |        | Dynll1        | Srsf7            |
| Dhx29             |                | Eif3g  |              | Hnrnpk    | Cpsf1                          | Pabpc1  | Rps15a             |        | Fam120c       | Tra2a            |
| Dhx30             |                | Eif3h  |              | Hnrnpl    | Cpsf2                          | Pabpc4  | Rps16              |        | Fam98a        | Tra2b            |
| Dhx36             |                | Eif3i  |              | Hnrnpm    | Csde1                          | Pcbp2   | Rps17              |        | Gys1          |                  |
| Dhx9              |                | Eif3k  |              | Hnrnpr    | D10Wsu52e                      | Pcbp3   | Rps18              |        | Iap           |                  |
|                   |                | Eif3l  |              | Hnrnpu    | FAM120A                        | Prkra   | Rps19              |        | Kpnb1         |                  |
|                   |                | Eif3m  |              | Hnrnpul2  | Fam195a                        | Ptbp1   | Rps2               |        | Lsm12         |                  |
|                   |                | Eif4e  |              | Hnrpd1    | G3bp1                          | Pum1    | Rps20              |        | Map1b         |                  |
|                   |                | Eif4g1 |              |           | G3bp2                          | Pum2    | Rps21              |        | Nxf7          |                  |
|                   |                | Eif4g3 |              |           | Gemin5                         | Pura    | Rps25              |        | Pgam5         |                  |
|                   |                |        |              |           | Gm10704                        | Purb    | Rps27              |        | Ppp1ca        |                  |
|                   |                |        |              |           | Gnb2l1                         | Rbm8a   | Rps28              |        | Ppp2cb        |                  |
|                   |                |        |              |           | Igf2bp3                        | Strap   | Rps3               |        | Ppp2r1a       |                  |
|                   |                |        |              |           | Ilf3                           | Syncrip | Rps3a              |        | Prrc2a        |                  |
|                   |                |        |              |           | Larp1                          | Tdrd3   | Rps4x              |        | Prrc2c        |                  |
|                   |                |        |              |           | Larp4                          | Top3b   | Rps6               |        | Timm50        |                  |
|                   |                |        |              |           | Larp4b                         | Upf1    | Rps7               |        | Tox4          |                  |
|                   |                |        |              |           | Lin28a                         | Upf2    | Rps8               |        | Trim28        |                  |
|                   |                |        |              |           | Magoh                          | Ybx1    | Rps9               |        | Ywhae         |                  |
|                   |                |        |              |           | Matr3                          | Zc3hav1 | Rpsa               |        | Ywhaz         |                  |
|                   |                |        |              |           | Mov10                          | Zfr     | Rrbp1              |        |               |                  |
|                   |                |        |              |           |                                |         | Ubap2l             |        |               |                  |

**Supplementary Table S1a: ATXN2 interactors and GO analysis (cont.)**

| <b>GO biological process complete ATXN2</b>                    | <b>P-value</b> |
|----------------------------------------------------------------|----------------|
| posttranscriptional regulation of gene expression (GO:0010608) | 1.82E-41       |
| RNA processing (GO:0006396)                                    | 5.10E-36       |
| translation (GO:0006412)                                       | 2.98E-32       |
| gene expression (GO:0010467)                                   | 8.05E-31       |
| RNA splicing (GO:0008380)                                      | 4.33E-23       |
| translational initiation (GO:0006413)                          | 2.93E-20       |
| establishment of RNA localization (GO:0051236)                 | 1.61E-11       |
| RNA transport (GO:0050658)                                     | 1.61E-11       |
| regulation of mRNA stability (GO:0043488)                      | 1.83E-09       |
| rRNA processing (GO:0006364)                                   | 4.74E-05       |
| stress granule assembly (GO:0034063)                           | 6.89E-03       |

| <b>GO cellular component complete ATXN2</b>                     | <b>P-value</b> |
|-----------------------------------------------------------------|----------------|
| ribonucleoprotein complex (GO:0030529)                          | 5.22E-78       |
| ribosome (GO:0005840)                                           | 7.73E-29       |
| cytoplasmic ribonucleoprotein granule (GO:0036464)              | 2.07E-24       |
| cytoplasmic stress granule (GO:0010494)                         | 1.07E-23       |
| spliceosomal complex (GO:0005681)                               | 1.22E-17       |
| eukaryotic translation initiation factor 3 complex (GO:0005852) | 3.34E-16       |
| polysome (GO:0005844)                                           | 8.03E-12       |
| CRD-mediated mRNA stability complex (GO:0070937)                | 1.17E-06       |
| exon-exon junction complex (GO:0035145)                         | 1.01E-05       |
| cytoplasmic mRNA processing body (GO:0000932)                   | 3.56E-03       |

**Supplementary Table S1b: C9ORF72 interactors and GO analysis**

| <b>C9orf72 homolog</b> | <b>MICOS</b> | <b>Mitochondrial proteins</b> | <b>Chaperones</b> | <b>Other</b> |
|------------------------|--------------|-------------------------------|-------------------|--------------|
| Smcr8                  | Chchd3       | Atad3                         | Cct2              | Ahsa1        |
|                        | Immt         | Atp5a1                        | Cct5              | Asz1         |
|                        |              | Atp5c1                        | Cct7              | Atp1a1       |
|                        |              | Dnaja1                        | Dnaja2            | Atp2a2       |
|                        |              | Pdha1                         | Dnajb11           | Bdh1         |
|                        |              | Pdhb                          | Dnajb12           | Cad          |
|                        |              | Pdhx                          | Tcp1              | Ckap4        |
|                        |              | Sdha                          |                   | Eef2         |
|                        |              | Slc25a12                      |                   | Far1         |
|                        |              | Slc25a3                       |                   | Hnrnpf       |
|                        |              | Slc25a4                       |                   | Iap          |
|                        |              | Slc25a5                       |                   | Map1b        |
|                        |              | Timm50                        |                   | Ncl          |
|                        |              | Vdac3                         |                   | Ppp1ca       |
|                        |              | Wdr41                         |                   | Rplp0        |
|                        |              |                               |                   | Rtn4         |
|                        |              |                               |                   | Slc16a1      |
|                        |              |                               |                   | Tox4         |

**Supplementary Table S1b: C9ORF72 interactors and GO analysis (cont.)**

| <b>GO biological process complete C9ORF72</b>    | <b>P-value</b> |
|--------------------------------------------------|----------------|
| protein folding (GO:0006457)                     | 1.50E-04       |
| mitochondrial membrane organization (GO:0007006) | 4.12E-02       |
| transport (GO:0006810)                           | 1.47E-02       |

| <b>GO cellular component complete C9ORF72</b> | <b>P-value</b> |
|-----------------------------------------------|----------------|
| myelin sheath (GO:0043209)                    | 1.53E-15       |
| mitochondrial inner membrane (GO:0005743)     | 2.40E-10       |
| chaperonin-containing T-complex (GO:0005832)  | 3.73E-06       |

**Supplementary Table S1c: FUS interactors and GO analysis**

| DNA/RNA helicases | Elavl proteins | EIFs  | FXR proteins | hnRNPs    | Other RNA/DNA binding proteins |         | Ribosomal proteins | snRNPs        | Others   | Histone proteins | RFs  | Splicing factors |
|-------------------|----------------|-------|--------------|-----------|--------------------------------|---------|--------------------|---------------|----------|------------------|------|------------------|
| Ddx1              | Elavl1         | Eif3b | Fmr1         | Hnrnpa0   | Alyref                         | Pabpc4  | Gm9493             | Eftud2 (U5)   | Erh      | H2afx            | Rfc1 | Sf3a1 (U11)      |
| Ddx21             | Elavl2         | Eif3c | Fxr1         | Hnrnpa1   | Atxn2l                         | Parp1   | Rpl11              | Snrnp200 (U5) | Fam98a   | Hist1h1a         | Rfc2 | Sf3b1 (U12)      |
| Ddx3x             | Elavl3         |       | Fxr2         | Hnrnpa2b1 | Bclaf1                         | Parp2   | Rpl12              | Snrpa (U1)    | Luzp4    | Hist1h2al        | Rfc3 | Sf3b2            |
| Ddx5              | Elavl4         |       |              | Hnrnpa3   | Caprin1                        | Pnkp    | Rplp0              | Snrpa1 (U2)   | Iap      | Hist1h2bp        | Rfc4 | Sf3b3            |
| Dhx15             |                |       |              | Hnrnpk    | Cdkn2aip                       | Polb    | Rps14              | Snrpb         | Lgals3bp | Hist1h3b         | Rfc5 | Sfpq             |
| Dhx30             |                |       |              | Hnrnpl    | Chd11                          | Prpf19  | Rps15a             | Thrap3        | Trim28   | Hist1h4a         |      | Srsf10           |
| Dhx36             |                |       |              | Hnrnmp    | D10Wsu52e                      | Prpf8   | Rps16              |               |          |                  |      | Srsf7            |
| Dhx9              |                |       |              | Hnrnpr    | G3bp1                          | Prrc2c  | Rps17              |               |          |                  |      | Tra2a            |
|                   |                |       |              | Hnrnpu    | G3bp2                          | Ptbp1   | Rps18              |               |          |                  |      | Tra2b            |
|                   |                |       |              | Hnrnpul1  | Gm10704                        | Raly    | Rps19              |               |          |                  |      |                  |
|                   |                |       |              | Hnrpdl    | Gnb211                         | Rbm14   | Rps25              |               |          |                  |      |                  |
|                   |                |       |              |           | Hnrnpc                         | Rpa1    | Rps3               |               |          |                  |      |                  |
|                   |                |       |              |           | Khdrbs1                        | Ssrp1   | Rps3a              |               |          |                  |      |                  |
|                   |                |       |              |           | Larp1                          | Supt16  | Rps4x              |               |          |                  |      |                  |
|                   |                |       |              |           | Lig3                           | Syncrip | Rps8               |               |          |                  |      |                  |
|                   |                |       |              |           | Magoh                          | Tmpo    | Rpsa               |               |          |                  |      |                  |
|                   |                |       |              |           | Matr3                          | Top1    |                    |               |          |                  |      |                  |
|                   |                |       |              |           | Mov10                          | Top2a   |                    |               |          |                  |      |                  |
|                   |                |       |              |           | Myef2                          | Upf1    |                    |               |          |                  |      |                  |
|                   |                |       |              |           | Ncbp1                          | Xrcc1   |                    |               |          |                  |      |                  |
|                   |                |       |              |           | Ncl                            | Xrcc5   |                    |               |          |                  |      |                  |
|                   |                |       |              |           | Nono                           | Xrcc6   |                    |               |          |                  |      |                  |
|                   |                |       |              |           | Nufip2                         | Xrn2    |                    |               |          |                  |      |                  |
|                   |                |       |              |           | Pabpc1                         | Zc3h11a |                    |               |          |                  |      |                  |

**Supplementary Table S1c: FUS interactors and GO analysis (cont.)**

| <b>GO cellular component complete FUS</b>        | <b>P-value</b> |
|--------------------------------------------------|----------------|
| ribonucleoprotein complex (GO:0030529)           | 1.48E-63       |
| spliceosomal complex (GO:0005681)                | 2.40E-29       |
| ribonucleoprotein granule (GO:0035770)           | 3.36E-17       |
| cytosolic ribosome (GO:0022626)                  | 1.31E-16       |
| chromosome (GO:0005694)                          | 3.51E-12       |
| cytoplasmic stress granule (GO:0010494)          | 1.72E-08       |
| DNA replication factor C complex (GO:0005663)    | 1.32E-07       |
| polysome (GO:0005844)                            | 2.71E-06       |
| paraspeckles (GO:0042382)                        | 6.48E-03       |
| CRD-mediated mRNA stability complex (GO:0070937) | 6.48E-03       |

| <b>GO biological process complete FUS</b>       | <b>P-value</b> |
|-------------------------------------------------|----------------|
| RNA processing (GO:0006396)                     | 2.18E-38       |
| RNA splicing (GO:0008380)                       | 1.65E-32       |
| DNA repair (GO:0006281)                         | 7.69E-12       |
| regulation of mRNA stability (GO:0043488)       | 4.58E-09       |
| RNA transport (GO:0050658)                      | 7.01E-09       |
| translation (GO:0006412)                        | 2.47E-07       |
| DNA replication (GO:0006260)                    | 6.91E-07       |
| ribosomal small subunit biogenesis (GO:0042274) | 9.28E-07       |

**Supplementary Table S1d: OPTN interactors and GO analysis**

| Kinases | Motor proteins | Autophagy /NFkB signaling | 14-3-3-proteins | ERAD   | Others        |
|---------|----------------|---------------------------|-----------------|--------|---------------|
| Csnk2a1 | Dynll1         | Ubc                       | Ywhab           | Nploc4 | 2410002F23Rik |
| Csnk2a2 | Dynll2         | Sqstm1                    | Ywhae           |        | Dhx15         |
|         |                | Tax1bp1                   | Ywhag           |        | Flot1         |
|         |                | Tbk1                      | Ywhah           |        | Iap           |
|         |                | Vcp                       | Ywhaq           |        | Prkar1a       |
|         |                | Rnf31                     | Ywhaz           |        | Rpn1          |
|         |                |                           |                 |        | Tbc1d15       |
|         |                |                           |                 |        | Tmem66        |
|         |                |                           |                 |        | Trim28        |
|         |                |                           |                 |        | Wrnip1        |

| GO biological process complete OPTN          | P-value  |
|----------------------------------------------|----------|
| intracellular protein transport (GO:0006886) | 1.32E-04 |
| cellular protein localization (GO:0034613)   | 1.46E-03 |

| GO cellular component complete OPTN     | P-value  |
|-----------------------------------------|----------|
| membrane-bounded organelle (GO:0043227) | 2.68E-02 |
| vesicle (GO:0031982)                    | 5.70E-03 |
| protein kinase CK2 complex (GO:0005956) | 8.47E-03 |



**Supplementary Table S1e: TDP-43 interactors and GO analysis**

| DNA/RNA helicases | Elavl proteins | EIFs    | FXR proteins | hnRNPs    | Other RNA/DNA binding proteins |         | Ribosomal proteins | snRNPs        | Others | Splicing factors |
|-------------------|----------------|---------|--------------|-----------|--------------------------------|---------|--------------------|---------------|--------|------------------|
| Ddx1              | Elavl1         | Eif2s1  | Fmr1         | Hnrnpa0   | Alyref                         | Nop58   | Rpl11              | Coil          | Iap    | Sf3a1 (U11)      |
| Ddx21             | Elavl2         | Eif2s3x | Fxr1         | Hnrnpa1   | Atxn2l                         | Pabpc1  | Rpl38              | Eftud2 (U5)   | Luzp4  | Sf3b1 (U12)      |
| Ddx39a            | Elavl3         | Eif3a   | Fxr2         | Hnrnpa2b1 | Caprin1                        | Pabpc4  | Rplp0              | Snrnp200 (U5) | Prrc2c | Sf3b2            |
| Ddx39b            | Elavl4         | Eif3b   |              | Hnrnpa3   | Cdc5l                          | Pabpn1  | Rps14              | Snrpa1 (U2)   |        | Sf3b3            |
| Ddx3x             |                | Eif3c   |              | Hnrnpab   | Celf1                          | Pcbp2   | Rps16              |               |        | Sfpq             |
| Ddx5              |                | Eif3e   |              | Hnrnpc    | Csde1                          | Pcbp3   | Rps17              |               |        | Snrpb            |
| Ddx6              |                | Eif3f   |              | Hnrnpd    | D10Wsu52e                      | Poldip3 | Rps18              |               |        | Srsf10           |
| Dhx15             |                | Eif3g   |              | Hnrnpf    | FAM120A                        | Prpf19  | Rps19              |               |        | Srsf3            |
| Dhx29             |                | Eif3h   |              | Hnrnph1   | Fbl                            | Prpf8   | Rps20              |               |        | Srsf7            |
| Dhx30             |                | Eif3i   |              | Hnrnpk    | G3bp1                          | Ptbp1   | Rps25              |               |        | Tra2a            |
| Dhx36             |                | Eif3l   |              | Hnrnpl    | Gar1                           | Pura    | Rps3               |               |        | Tra2b            |
| Dhx9              |                | Eif4a1  |              | Hnrnpr    | Gm10704                        | Raly    | Rps3a              |               |        |                  |
|                   |                | Eif4a3  |              | Hnrnpu    | Gnb2l1                         | Rbm14   | Rps4x              |               |        |                  |
|                   |                | Eif4g1  |              | Hnrnpul1  | Ilf2                           | Rbm8a   | Rps7               |               |        |                  |
|                   |                |         |              | Hnrnpul2  | Ilf3                           | Rbmx11  | Rps8               |               |        |                  |
|                   |                |         |              | Hnrpdl    | Khdrbs1                        | Srtr    | Rpsa               |               |        |                  |
|                   |                |         |              |           | Larp1                          | Ssb     |                    |               |        |                  |
|                   |                |         |              |           | Larp4                          | Strap   |                    |               |        |                  |
|                   |                |         |              |           | Magoh                          | Syncrip |                    |               |        |                  |
|                   |                |         |              |           | Matr3                          | Upf1    |                    |               |        |                  |
|                   |                |         |              |           | Mov10                          | Ybx1    |                    |               |        |                  |
|                   |                |         |              |           | Msi2                           | Ybx3    |                    |               |        |                  |
|                   |                |         |              |           | Myef2                          | Zc3h11a |                    |               |        |                  |
|                   |                |         |              |           | Ncl                            | Zc3h14  |                    |               |        |                  |
|                   |                |         |              |           | Nhp2l1                         | Zc3hav1 |                    |               |        |                  |
|                   |                |         |              |           | Nolc1                          | Zfr     |                    |               |        |                  |
|                   |                |         |              |           | Nono                           | Znf326  |                    |               |        |                  |
|                   |                |         |              |           | Nop56                          |         |                    |               |        |                  |

**Supplementary Table S1e: TDP-43 interactors and GO analysis (cont.)**

| <b>GO biological process complete TDP-43</b>                   | <b>P-value</b> |
|----------------------------------------------------------------|----------------|
| RNA processing (GO:0006396)                                    | 8.36E-59       |
| gene expression (GO:0010467)                                   | 6.91E-51       |
| RNA splicing (GO:0008380)                                      | 1.63E-45       |
| posttranscriptional regulation of gene expression (GO:0010608) | 8.57E-34       |
| translation (GO:0006412)                                       | 7.48E-26       |
| translational initiation (GO:0006413)                          | 8.98E-18       |
| regulation of mRNA stability (GO:0043488)                      | 2.79E-13       |
| RNA transport (GO:0050658)                                     | 2.56E-12       |
| ncRNA processing (GO:0034470)                                  | 6.33E-07       |
| rRNA processing (GO:0006364)                                   | 8.78E-07       |
| RNA export from nucleus (GO:0006405)                           | 1.17E-04       |
| ribonucleoprotein complex export from nucleus (GO:0071426)     | 2.10E-04       |

| <b>GO cellular component complete TDP-43</b>                           | <b>P-value</b> |
|------------------------------------------------------------------------|----------------|
| ribonucleoprotein complex (GO:0030529)                                 | 7.92E-98       |
| spliceosomal complex (GO:0005681)                                      | 2.38E-42       |
| ribonucleoprotein granule (GO:0035770)                                 | 4.67E-19       |
| ribosome (GO:0005840)                                                  | 3.30E-15       |
| eukaryotic translation initiation factor 3 complex (GO:0005852)        | 1.07E-14       |
| cytoplasmic stress granule (GO:0010494)                                | 3.21E-13       |
| eukaryotic translation initiation factor 3 complex, eIF3m (GO:0071541) | 2.11E-08       |
| CRD-mediated mRNA stability complex (GO:0070937)                       | 6.34E-07       |
| polysome (GO:0005844)                                                  | 6.72E-06       |
| box C/D snoRNP complex (GO:0031428)                                    | 8.74E-05       |
| exon-exon junction complex (GO:0035145)                                | 2.43E-04       |
| Cajal body (GO:0015030)                                                | 1.49E-03       |
| histone pre-mRNA 3' end processing complex (GO:0071204)                | 9.58E-03       |
| paraspeckles (GO:0042382)                                              | 9.58E-03       |

**Supplementary Table S1f: UBQLN2 interactors and GO analysis**

| 14-3-3 proteins | Autophagy /NFkB signaling | Bat3 complex | E3 ubiquitin ligases | Endo/ lysosomal trafficking | ERAD   | ER-Golgi | Kinases | Proteasome proteins | Others   |         |
|-----------------|---------------------------|--------------|----------------------|-----------------------------|--------|----------|---------|---------------------|----------|---------|
| Ywhab           | Nbr1                      | Asna1        | Hltf                 | Atp6v0a1                    | Faf2   | Arf1     | Csnk2a1 | Adrm1               | Ankrd13a | Lgals8  |
| Ywhae           | Optn                      | Bag6         | Itch                 | Atp6v0d1                    | Nploc4 | Get4     | Csnk2b  | Psma3               | Atxn10   | Nvl     |
| Ywhag           | Sqstm1                    | Ubl4a        | Trim32               | Atp6v1a                     | Ufd1l  | Rab1     | Gsk3b   | Psma5               | Bag2     | Pcm1    |
| Ywhah           | Tax1bp1                   |              |                      | Atp6v1e1                    | Vcp    | Rab6a    |         | Psma6               | Calcoco1 | Pdcd6   |
| Ywhaz           | Tbk1                      |              |                      | Cltc                        |        | Rap1     |         | Psma7               | Dnaja2   | Peg10   |
|                 | Tnip1                     |              |                      | Hap1                        |        |          |         | Psmb1               | Eef2     | Ppia    |
|                 | Tollip                    |              |                      | Pdcd6ip                     |        |          |         | Psmb2               | Eno1     | Prkar1a |
|                 | Ub                        |              |                      | Rab7a                       |        |          |         | Psmb3               | Fam115a  | Ret     |
|                 | Ubqln1                    |              |                      | Stam                        |        |          |         | Psmb5               | Fth1     | Rtl1    |
|                 | Vcp                       |              |                      | Tbc1d15                     |        |          |         | Psmb6               | Ftl      | Sdcbp   |
|                 |                           |              |                      | Tbc1d17                     |        |          |         | Psmc1               | Gapdh    | Stmn3   |
|                 |                           |              |                      | Tom1                        |        |          |         | Psmc2               | Iap      | Stom    |
|                 |                           |              |                      |                             |        |          |         | Psmc3               | Keap1    | Tmem66  |
|                 |                           |              |                      |                             |        |          |         | Psmc4               | Kpnb1    | Tprgl   |
|                 |                           |              |                      |                             |        |          |         | Psmc5               |          | Vim     |
|                 |                           |              |                      |                             |        |          |         | Psmc6               |          | Wbp2    |
|                 |                           |              |                      |                             |        |          |         | Psmc7               |          | Wrnip1  |
|                 |                           |              |                      |                             |        |          |         | Psmc8               |          |         |
|                 |                           |              |                      |                             |        |          |         | Psmc9               |          |         |
|                 |                           |              |                      |                             |        |          |         | Psmc10              |          |         |
|                 |                           |              |                      |                             |        |          |         | Psmc11              |          |         |
|                 |                           |              |                      |                             |        |          |         | Psmc12              |          |         |
|                 |                           |              |                      |                             |        |          |         | Psmc13              |          |         |
|                 |                           |              |                      |                             |        |          |         | Psmc14              |          |         |
|                 |                           |              |                      |                             |        |          |         | Psmc15              |          |         |
|                 |                           |              |                      |                             |        |          |         | Psmc16              |          |         |
|                 |                           |              |                      |                             |        |          |         | Psmc17              |          |         |
|                 |                           |              |                      |                             |        |          |         | Psmc18              |          |         |
|                 |                           |              |                      |                             |        |          |         | Psmc19              |          |         |
|                 |                           |              |                      |                             |        |          |         | Psmc20              |          |         |
|                 |                           |              |                      |                             |        |          |         | Psmc21              |          |         |
|                 |                           |              |                      |                             |        |          |         | Psmc22              |          |         |
|                 |                           |              |                      |                             |        |          |         | Psmc23              |          |         |
|                 |                           |              |                      |                             |        |          |         | Psmc24              |          |         |
|                 |                           |              |                      |                             |        |          |         | Psmc25              |          |         |
|                 |                           |              |                      |                             |        |          |         | Psmc26              |          |         |
|                 |                           |              |                      |                             |        |          |         | Psmc27              |          |         |
|                 |                           |              |                      |                             |        |          |         | Psmc28              |          |         |
|                 |                           |              |                      |                             |        |          |         | Psmc29              |          |         |
|                 |                           |              |                      |                             |        |          |         | Psmc30              |          |         |
|                 |                           |              |                      |                             |        |          |         | Psmc31              |          |         |
|                 |                           |              |                      |                             |        |          |         | Psmc32              |          |         |
|                 |                           |              |                      |                             |        |          |         | Psmc33              |          |         |
|                 |                           |              |                      |                             |        |          |         | Psmc34              |          |         |
|                 |                           |              |                      |                             |        |          |         | Psmc35              |          |         |
|                 |                           |              |                      |                             |        |          |         | Psmc36              |          |         |
|                 |                           |              |                      |                             |        |          |         | Psmc37              |          |         |
|                 |                           |              |                      |                             |        |          |         | Psmc38              |          |         |
|                 |                           |              |                      |                             |        |          |         | Psmc39              |          |         |
|                 |                           |              |                      |                             |        |          |         | Psmc40              |          |         |
|                 |                           |              |                      |                             |        |          |         | Psmc41              |          |         |
|                 |                           |              |                      |                             |        |          |         | Psmc42              |          |         |
|                 |                           |              |                      |                             |        |          |         | Psmc43              |          |         |
|                 |                           |              |                      |                             |        |          |         | Psmc44              |          |         |
|                 |                           |              |                      |                             |        |          |         | Psmc45              |          |         |
|                 |                           |              |                      |                             |        |          |         | Psmc46              |          |         |
|                 |                           |              |                      |                             |        |          |         | Psmc47              |          |         |
|                 |                           |              |                      |                             |        |          |         | Psmc48              |          |         |
|                 |                           |              |                      |                             |        |          |         | Psmc49              |          |         |
|                 |                           |              |                      |                             |        |          |         | Psmc50              |          |         |

**Supplementary Table S1f: UBQLN2 interactors and GO analysis (cont.)**

| <b>GO biological process complete UBQLN2</b>                                   | <b>P-value</b> |
|--------------------------------------------------------------------------------|----------------|
| cellular protein catabolic process (GO:0044257)                                | 8.90E-27       |
| proteasome-mediated ubiquitin-dependent protein catabolic process (GO:0043161) | 5.49E-19       |
| ERAD pathway (GO:0036503)                                                      | 5.79E-14       |
| response to endoplasmic reticulum stress (GO:0034976)                          | 1.74E-10       |
| cellular protein localization (GO:0034613)                                     | 8.10E-08       |

| <b>GO cellular component complete UBQLN2</b>  | <b>P-value</b> |
|-----------------------------------------------|----------------|
| proteasome complex (GO:0000502)               | 3.34E-46       |
| extracellular vesicle (GO:1903561)            | 2.51E-25       |
| VCP-NPL4-UFD1 AAA ATPase complex (GO:0034098) | 5.92E-05       |
| ER membrane insertion complex (GO:0072379)    | 3.85E-04       |
| BAT3 complex (GO:0071818)                     | 3.85E-04       |

**Supplementary Table S2: Overlapping proteins FUS, TDP-43 and ATXN2 and OPTN and UBLQN2**

**Overlapping proteins FUS, TDP-43 and ATXN2**

| <b>Elavl proteins</b> | <b>EIFs</b> | <b>FXR proteins</b> | <b>hnRNPs</b> | <b>Other RNA/DNA binding proteins</b> | <b>Ribosomal proteins</b> | <b>snRNPs</b> | <b>Splicing factors</b> | <b>Others</b> |
|-----------------------|-------------|---------------------|---------------|---------------------------------------|---------------------------|---------------|-------------------------|---------------|
| Elavl1                | Eif3b       | Fmr1                | Hnrnpa0       | Alyref                                | Rps7                      | Snrpa1        | Sf3b2                   | Iap           |
| Elavl2                | Eif3c       | Fxr1                | Hnrnpa1       | Atxn2l                                | Rpl11                     |               | Sf3b3                   |               |
| Elavl3                |             | Fxr2                | Hnrnpa2b1     | Caprin1                               | Rplp0                     |               | Sfpq                    |               |
| Elavl4                |             |                     | Hnrnpa3       | D10Wsu52e                             | Rps14                     |               | Srsf10                  |               |
|                       |             |                     | Hnrnpk        | G3bp1                                 | Rps16                     |               | Srsf7                   |               |
|                       |             |                     | Hnrnpl        | Gm10704                               | Rps17                     |               | Tra2a                   |               |
|                       |             |                     | Hnrnpm        | Gnb2l1                                | Rps18                     |               | Tra2b                   |               |
|                       |             |                     | Hnrnpr        | Larp1                                 | Rps19                     |               |                         |               |
|                       |             |                     | Hnrnpu        | Magoh                                 | Rps25                     |               |                         |               |
|                       |             |                     | Hnrpdl        | Matr3                                 | Rps3                      |               |                         |               |
|                       |             |                     |               | Mov10                                 | Rps3a                     |               |                         |               |
|                       |             |                     |               | Myef2                                 | Rps4x                     |               |                         |               |
|                       |             |                     |               | Ncl                                   | Rps8                      |               |                         |               |
|                       |             |                     |               | Pabpc1                                | Rpsa                      |               |                         |               |
|                       |             |                     |               | Pabpc4                                |                           |               |                         |               |
|                       |             |                     |               | Prrc2c                                |                           |               |                         |               |
|                       |             |                     |               | Ptbp1                                 |                           |               |                         |               |
|                       |             |                     |               | Syncrip                               |                           |               |                         |               |
|                       |             |                     |               | Upf1                                  |                           |               |                         |               |

**Supplementary Table S2: Overlapping proteins FUS, TDP-43 and ATXN2 and OPTN and UBLQN2 (cont.)**

**Overlapping proteins OPTN and UBQLN2**

| 14-3-3 proteins                           | Autophagy/NFkB signaling         | Endo-lysosomal trafficking | ERAD   | Kinases | Others                             |
|-------------------------------------------|----------------------------------|----------------------------|--------|---------|------------------------------------|
| Ywhab<br>Ywhae<br>Ywhag<br>Ywhah<br>Ywhaz | Sqstm1<br>Tax1bp1<br>Tbk1<br>Vcp | Tbc1d15                    | Nploc4 | Csnk2a1 | Iap<br>Prkar1a<br>Wrnip1<br>Tmem66 |
